# Supplementary material for: BRD4 inhibition and FXR activation, individually beneficial in cholestasis, are antagonistic in combination
Source: JCI journal article supplement (doi:10.1172/jci.insight.141640), 2020-12-08
Supplement: sd1 [file 1]

## **Supplemental Information**

**BRD4 inhibition and FXR activation, individually beneficial  
in cholestasis, are antagonistic in combination**

**Jung *et al.***

## Supplemental Figures

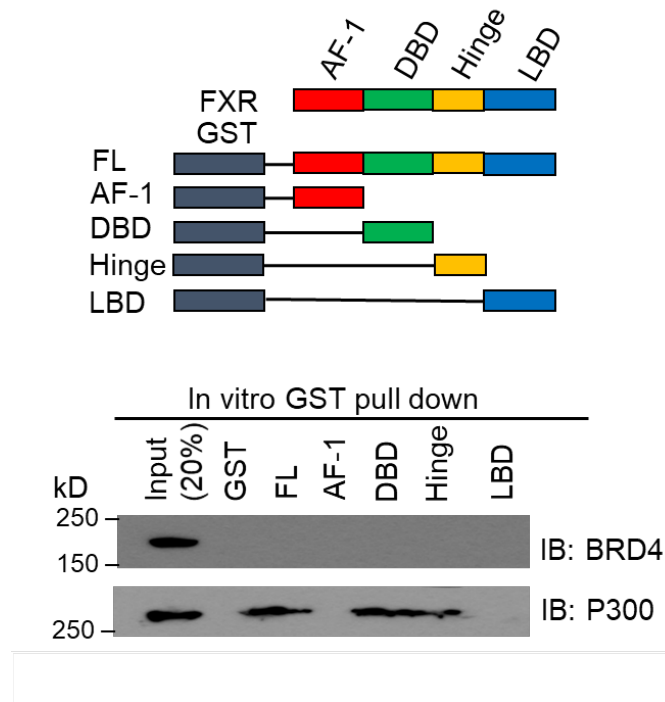

**Supplemental Figure 1. BRD4 and FXR do not directly interact.** GST-pull down: Schematic of the GST fusion proteins containing different regions of FXR (top). GST-FXR fusion proteins expressed in bacteria were purified by Glutathione Sepharose-4B slurry (GE Healthcare, Inc) and 1-2  $\mu$ g of GST-FXR fusion proteins were incubated with p300 or BRD4 synthesized using the in vitro transcription and translation kit (Promega, Inc) and p300 or BRD4 bound to the GST-FXR proteins was detected by Immunoblotting (bottom). Consistent results were obtained from 3 independent GST pull down assays.

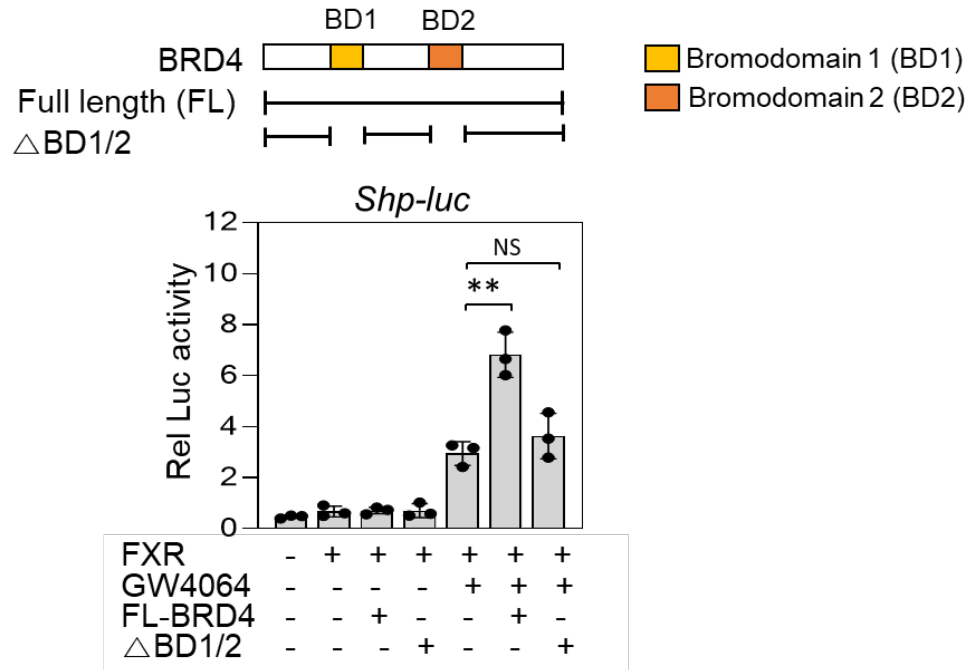

**Supplemental Figure 2. The BD1 and BD2 domains are important for FXR coactivation of *Shp* by BRD4.** HepG2 cells were infected with Ad-FXR or transfected with expression plasmids for full length BRD4 (FL-BRD4) or BRD4 lacking the BD1 and BD2 domains (ΔBD1/2) and reporter plasmids, *Shp-luc* and β-galactosidase, and then, treated with GW4064, as indicated. Luciferase activities normalized to β-galactosidase levels. Mean and standard deviation are plotted. Statistical significance was determined by one-way ANOVA (n=3 culture dishes). \* p < 0.05, \*\* p < 0.01, NS, not significant. Consistent results were obtained from 2 independent experiments.

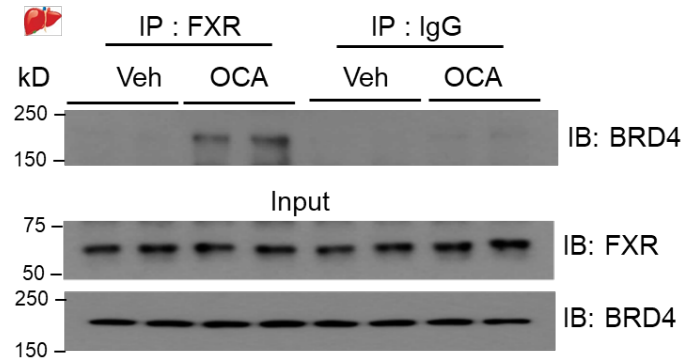

**Supplemental Figure 3. OCA treatment of mice increases the interaction of BRD4 with the FXR complex in liver extracts.** C57BL/6 mice were treated with OCA or vehicle for 3 h and CoIP assays were done. Levels of BRD4 in anti-FXR immune complexes from whole cell liver extracts and of input proteins determined by immunoblotting. Tissue from 2 mice were pooled for each sample and the experiment was done twice.

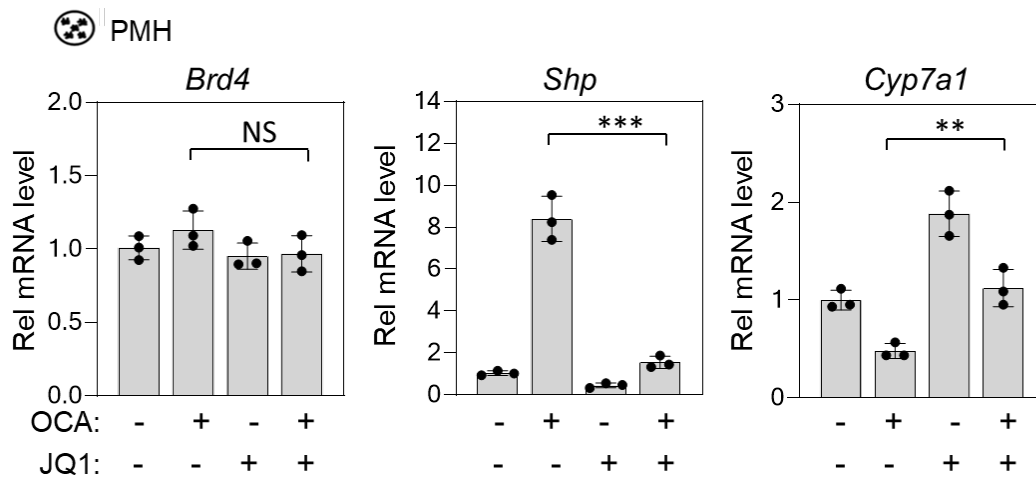

**Supplemental Figure 4. OCA-mediated induction of *Shp* and repression of *Cyp7a1* are BRD4-dependent.** OCA treatment increased *Shp* mRNA levels and subsequently, decreased *Cyp7a1* mRNA levels, and these effects were blunted by treatment with the BRD4 inhibitor, JQ1. PMH were treated with either 1  $\mu$ M OCA or 500 nM JQ1 for 3 h or 24 h, respectively, or both. Levels of *Shp* and *Cyp7a1* mRNAs determined by RT-qPCR. Mean and standard deviation are plotted. Statistical significance was determined by two-way ANOVA (n=3 culture dishes). \*  $p < 0.05$ , \*\*  $p < 0.01$ , \*\*\*  $p < 0.001$ , NS, not significant. Consistent results were obtained from 2 independent experiments.

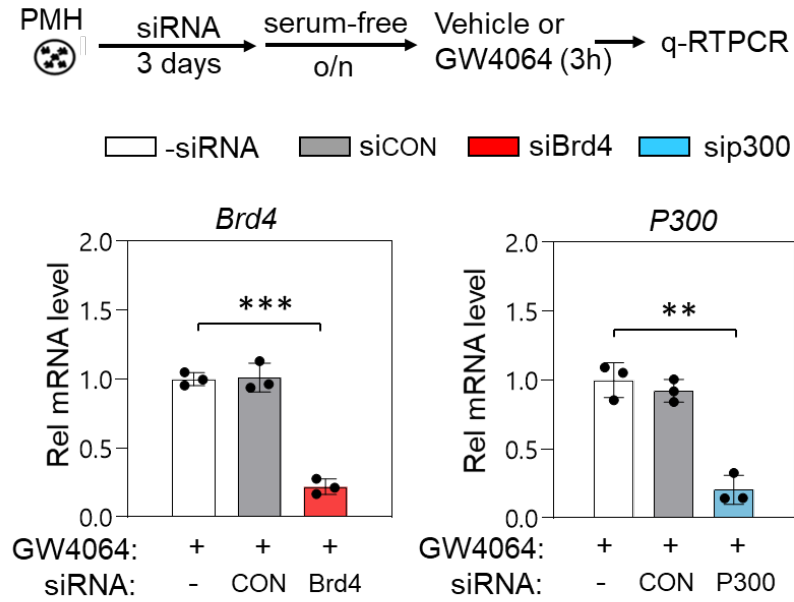

**Supplemental Figure 5. siRNA-mediated downregulation of BRD4 or p300 in primary mouse hepatocytes (PMH).** To examine the effects of downregulation of BRD4 or p300 on factor occupancy (Fig. 3D) and H3K9/14-Ac levels (Fig. 3E) at the *Shp* promoter in PMH, BRD4 or p300 was downregulated using siRNA. Experimental outline (top) and mRNA levels of *Brd4* (bottom, left) and *p300* (bottom, right). Mean  $\pm$  SD. Statistical significance was determined by one-way ANOVA (n=3 culture dishes), \*\*  $p < 0.01$ , \*\*\*  $p < 0.001$ . Consistent results were obtained from 2 independent experiments.

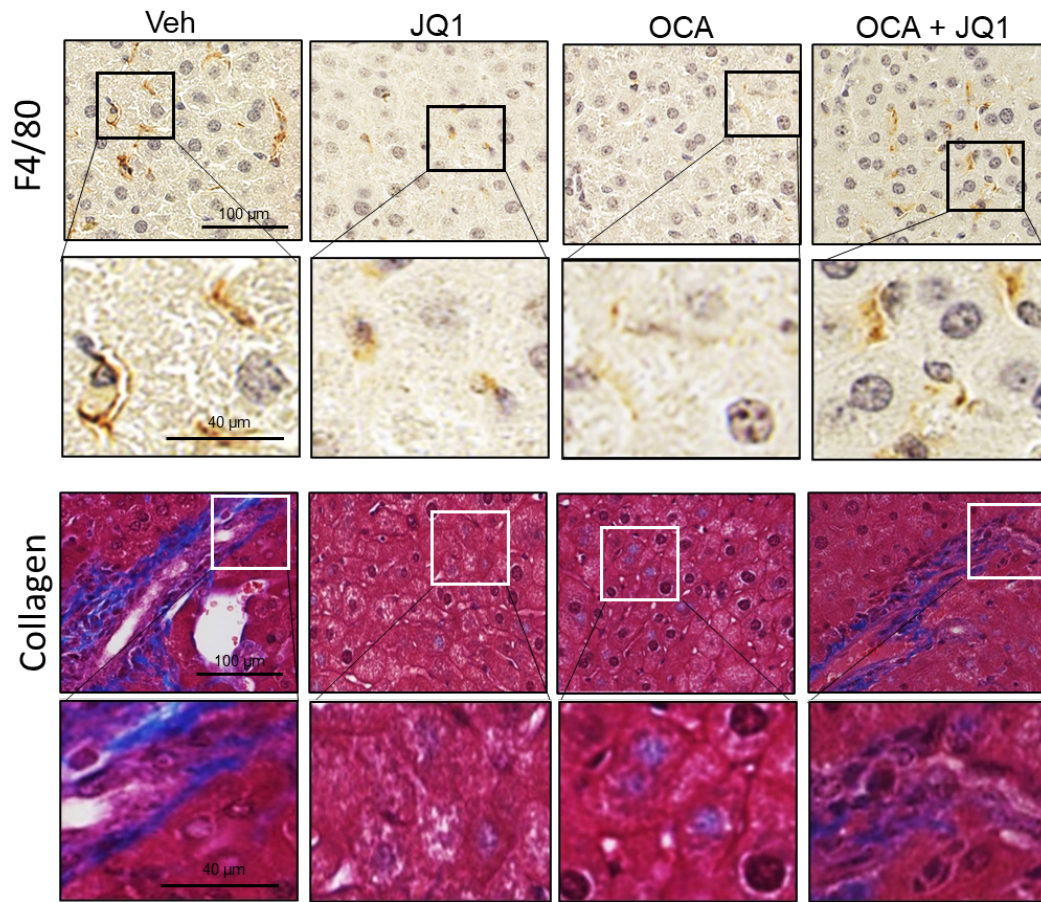

**Supplemental Figure 6.** Images from Figure 4D at higher magnification showing F4/80 (top) and collagen (bottom) staining of liver sections (scale bar = 100  $\mu$ m in the original images and 40  $\mu$ m in the images at increased magnification).

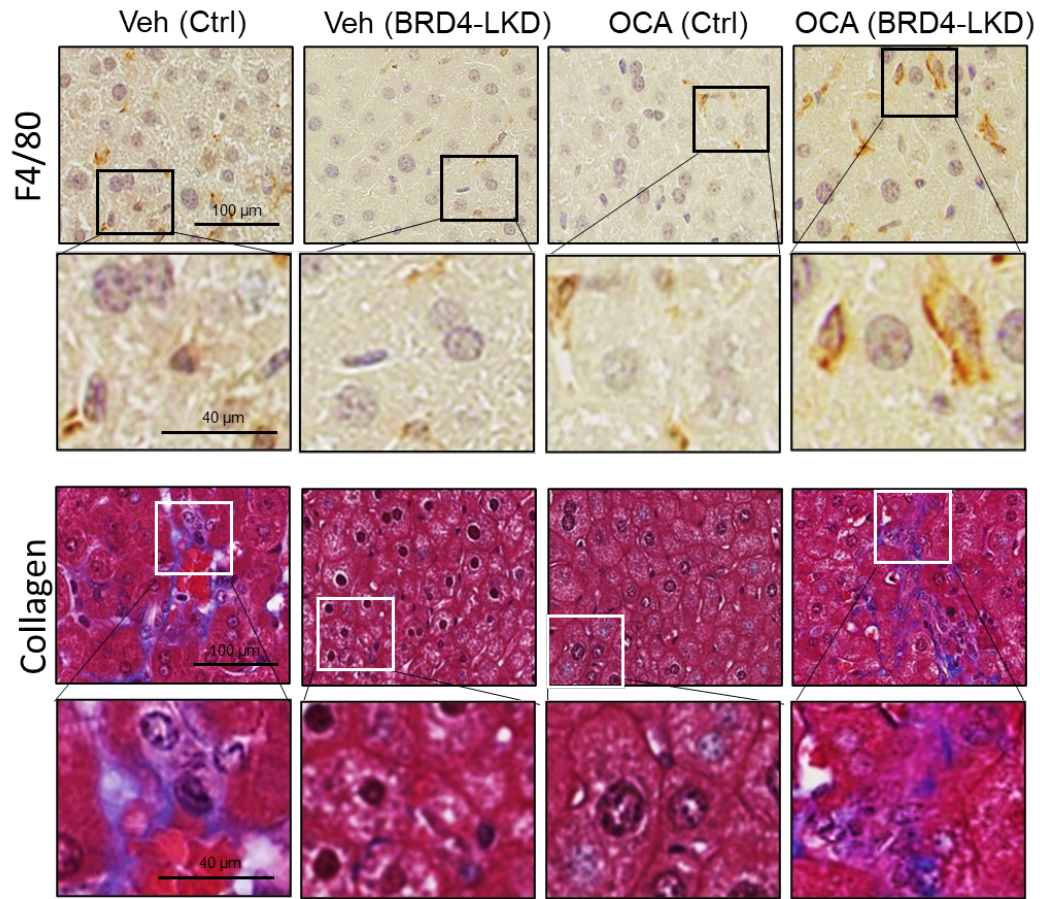

**Supplemental Figure 7.** Images from Figure 5D at higher magnification showing F4/80 (top) and collagen (bottom) staining of liver sections (scale bar = 100  $\mu\text{m}$  in the original images and 40  $\mu\text{m}$  in the images at increased magnification).



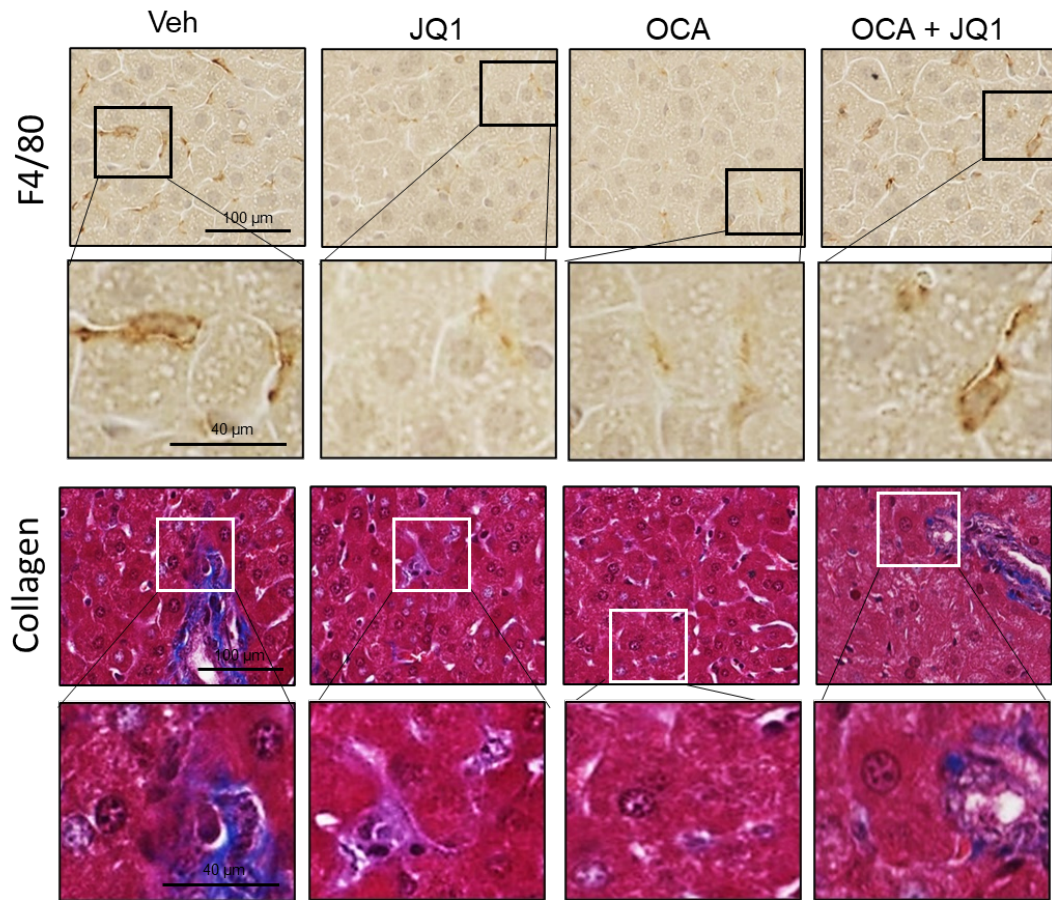

**Supplemental Figure 8.** Images from Figure 7D at higher magnification showing F4/80 (top) and collagen (bottom) staining of liver sections (scale bar = 100  $\mu\text{m}$  in the original images and 40  $\mu\text{m}$  in the images at increased magnification).

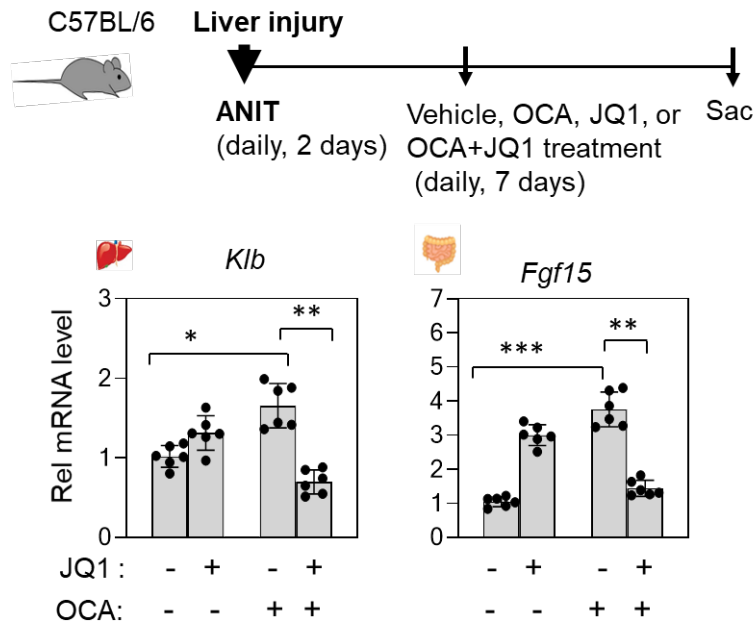

**Supplemental Figure 9. Effects of treatment with either OCA or JQ1, or cotreatment with both drugs on mRNA levels of hepatic *Klb* and intestinal *Fgf15*.** C57BL/6 mice were treated daily with 35 mg/kg with ANIT for 2 days and then, further treated daily with 10 mg/kg OCA or 50 mg/kg JQ1 for 7 days. Levels of hepatic and intestinal mRNAs of the indicated genes measured by RT-qPCR. Mean and standard deviation are plotted. Statistical significance was determined by two-way ANOVA (n=6 mice), \*\* p < 0.01, \*\*\* p < 0.001.

## Cholestatic Liver Injury by Lithocholic acid (LCA) Feeding

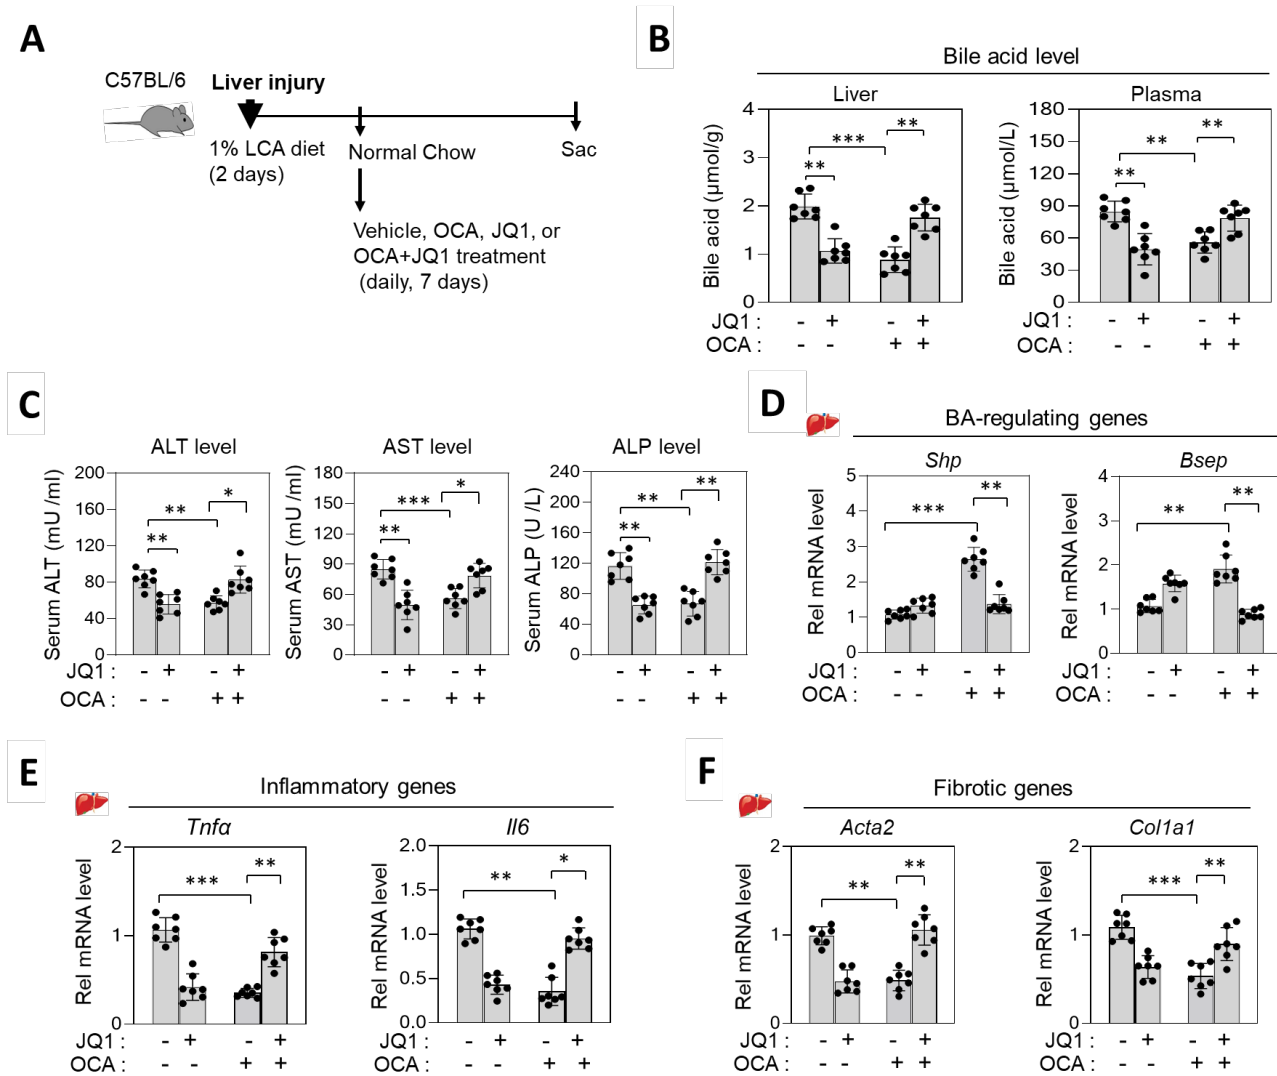

**Supplemental Figure 10. In LCA-induced cholestatic mice, potential therapeutic benefits of OCA or JQ1 are largely abolished by co-treatment with both drugs.** C57BL/6 mice were fed with 1% LCA-supplemented chow for 2 days and treated daily with either 10 mg/kg OCA or 50 mg/kg JQ1 or both for 7 days under normal chow conditions. **(A)** Experimental outline. **(B)** Levels of hepatic and plasma BA. **(C)** Serum levels of ALT, AST, and ALP. **(D, E, F)** Hepatic mRNAs of the indicated genes measured by RT-qPCR. **(B-F)** Mean and standard deviation are plotted. Statistical significance was determined by two-way ANOVA (n=7 mice), \*  $p < 0.05$ , \*\*  $p < 0.01$ , \*\*\*  $p < 0.001$ .

**Supplemental Table 1.** Antibody information

| <b>Name</b>  | <b>Supplier</b>   | <b>Catalog number</b> | <b>Dilution</b>           |
|--------------|-------------------|-----------------------|---------------------------|
| Histone H3   | Abcam             | ab1791                | ChIP (1µg)                |
| BRD4         | BETHYL Lab        | A301-985A             | ChIP (1.5µg), IB (1:2000) |
| FXR          | Santa Cruz        | sc-25309              | ChIP (1.5µg), IB (1:2000) |
| P300         | Santa Cruz        | sc-48343              | ChIP (1µg)                |
| Pol II       | Abcam             | ab5131                | ChIP (1µg)                |
| BRD2         | BETHYL Lab        | A302-583A             | IB (1:4000)               |
| BRD3         | Santa Cruz        | sc-81202              | IB (1:4000)               |
| NF-κB p65    | Cell Signaling    | 8242                  | ChIP(1µg)                 |
| Flag M2      | Sigma             | F1804                 | IB (1:3000)               |
| F4/80        | NOVUS Biologicals | NB600-404             | IHC (1:2000)              |
| AcH3(K9/K14) | Cell Signaling    | 9677                  | ChIP (1µg)                |
| B-ACTIN      | Cell Signaling    | 4970                  | IB (1:10000)              |
| SMRT         | Abcam             | ab24551               | ChIP (1µg)                |
| SHP          | Abcam             | Ab186874              | IB (1:3000)               |
| CYP7A1       | Thermo Fisher     | PA5-100892            | IB (1:4000)               |
| TNFα         | Abcam             | ab183218              | IB (1:3000)               |
| COL1a1       | Santa Cruz        | sc-293182             | IB (1:4000)               |

ChIP volume : 300µl

**Supplemental Table 2.** Primers used for RT-qPCR and ChIP-qPCR

| <b>RT-qPCR</b> | Forward (5'-3')          | Reverse (5'-3')          |
|----------------|--------------------------|--------------------------|
| <i>Shp</i>     | CAAGAAGATTCTGCTGGAGG     | GGATGTCAACATCTCCAATG     |
| <i>Bsep</i>    | CAATGTTCAGTTCCTCCGTTCA   | TTTGGTGTGTCCCCSTSCCTTG   |
| <i>Mrp2</i>    | TATCCCCGGGAAATCTGTTC     | TAACCAACATTCTCCGCGC      |
| <i>Cyp7a1</i>  | AACGGGTTGATTCCATACCTGG   | GTGGACATATTTCCCCATCAGTT  |
| <i>Cyp8b1</i>  | GAATCTAACCAGGCCATGCT     | AGGAGCTGGCACCTAGACT      |
| <i>Oatp</i>    | GTCTTACGAGTGTGCTCCAGAT   | GGAATACTGCCTCTGAAGTGGATT |
| <i>Ntcp</i>    | TACCTCCTCCCTGATGCCTTTC   | TGCGTCTGCAGCTTGGAATTA    |
| <i>Fgf15</i>   | GTTTCACCGCTCCTTCTTTG     | CATCCTCCACCATCCTGAAC     |
| <i>Osta</i>    | TGGACCCTGGAAGACATA       | TAACCACTGATAAGGCTGAG     |
| <i>Ostβ</i>    | ATCTTGATGACTCCATAATG     | GTCTTTCTCTTTCAACTCA      |
| <i>Asbt</i>    | TGGAATGCAGAACACTCAGC     | GCAAAGACGAGCTGGAAAAC     |
| <i>Cck</i>     | AAGTGACCGGGACTACATGG     | CCCACTACGATGGGTATTG      |
| <i>Mafg</i>    | GACCCCCAATAAAGGAAACAA    | TCAACTCTCGCACCGACAT      |
| <i>Lsd1</i>    | AGCAGCCCTGTTTCCCAGAC     | TGCAATGTGCGATTCTGAT      |
| <i>Klb</i>     | CGAGCCCATTGTTACCTTGT     | CTCCAAAGGTCTGGAAGCAG     |
| <i>Fxr</i>     | TGTGAGGGCTGCAAAGGTT      | ACATCCCCATCTTGAC         |
| <i>Tnfa</i>    | AGCCCCCAGTCTGTATCCTT     | GGTCACTGTCCCAGCATCTT     |
| <i>Il6</i>     | AGAAGGAGTGGCTAAGGACCAA   | AACGCACTAGGTTTGCCGAGTA   |
| <i>Il6ra</i>   | CCAGGTGCCCTGTCAGTATT     | CTGGACTTGCTTCCCACACT     |
| <i>Tnfsf4</i>  | CTGAACGATGGTCTGAAGGAT    | ACAACAATCAGCTCCCCATC     |
| <i>Acta2</i>   | CAGCCATCTTTCATTGGGATGGAG | AATGCCTGGGTACATGGTGG     |
| <i>Col1a1</i>  | GAAGTGGACTGTCCCAACCC     | TTGGGTCCCTCGACTCCTAC     |
| <i>Timp1</i>   | ACTCGGACCTGGTCATAAGGG    | CGCTGGTATAAGGTGGTCTCGT   |

| <b>ChIP</b>                 | Forward (5'-3')       | Reverse (5'-3')      |
|-----------------------------|-----------------------|----------------------|
| <i>Shp</i><br>(-412/-100)   | CAGTGAGAACCCTGGTCTT   | CTGGCCAAACAACCTTGAC  |
| <i>Shp</i><br>(-3.0/-2.7kb) | ACAGACAAGGCCACACTTCC  | TGGCTCAACAGGTAAGAGCA |
| <i>Il6ra</i>                | GGTACCCACAGATCCCAGAA  | GTTGCTGAGGACCAAGTTGC |
| <i>Tnfsf4</i>               | AAATTTTGGTGCATGTGTGTG | GCCAAGCCTGATAACCTGAG |
